# Supplementary material for: Early risk stratification for diffuse large B-cell lymphoma integrating interim Deauville score and International Prognostic Index
Source: Springer Nature journal article supplement (doi:10.1007/s00277-019-03834-4), 2019-11-11
Supplement: MOESM1 [file 17373948]

**Supporting information**

**Annals of Hematology**

**Early risk stratification for diffuse large B-cell lymphoma integrating interim Deauville score and international prognostic index**

Sung Kyun Yim,1* Ho-Young Yhim,1,2* Yeon-Hee Han,3* So-Yeon Jeon,1,2 Na-Ri Lee,1,2 Eun-Kee Song,1,2 Hwan-Jeong Jeong,2,3 Hee Sun Kim,4 Jae-Yong Kwak1,2

1Department of Internal Medicine, Chonbuk National University Medical School, Jeonju; 2Research Institute of Clinical Medicine of Chonbuk National University-Biomedical Research Institute of Chonbuk National University Hospital, Jeonju; 3Department of Nuclear Medicine, Chonbuk National University Medical School, Jeonju; 4College of Nursing, Chonbuk National University, Jeonju, Republic of Korea.

Address for correspondence and reprints:

Jae-Yong Kwak, MD, PhD.

Department of Internal Medicine, Chonbuk National University Medical School, 20 Geonji-ro, Deokjin-gu, Jeonju, 54907, Republic of Korea

E-mail address: [jykwak@jbnu.ac.kr](mailto:jykwak@jbnu.ac.kr); Tel: +82-63-250-1791; Fax: +82-63-254-1609

*S.K.Y, H.-Y.Y, and Y.-H.H contributed equally to this work as co-first authors.

**Table S1: Interobserver agreement in interpreting interim PET-CT.**

|  |  |  | Primary reviewer | | | | | |  |  |
| --- | --- | --- | --- | --- | --- | --- | --- | --- | --- | --- |
|  | Deauville score | | 1 | 2 | 3 |  | 4 | 5 |  | Total |
|  | Negative | | |  | Positive | |  |  |
| Second reviewer | 1 | Negative | 57 | 8 | 2 |  |  |  |  | 67 |
| 2 |  | 54 | 8 |  | 2 |  |  | 64 |
| 3 |  | 8 | 29 |  | 8 |  |  | 45 |
|  |  |  |  |  |  |  |  |  |  |
| 4 | Positive |  | 2 | 7 |  | 22 |  |  | 31 |
| 5 |  |  |  |  | 2 | 11 |  | 13 |
|  | Total |  | 57 | 72 | 46 |  | 34 | 11 |  |  |

Deauville scores were dichomotized as negative (score of 1−3) or positive (score of 4−5). Among 152 interim PET-CT scans that were assigned to the Deauville score of 2, 3, or 4 by primary reviewer, the reviewers agreed on interim Deauville score (score of 1-3 [negative] or score of 4-5 [positive]), yielding an overall agreement of 87.5% (gray area).

**Table S2: Univariate analysis for progression-free survival and overall survival.**

| Variables | Patients (N, %) | Progression-free survival | | Overall survival | |
| --- | --- | --- | --- | --- | --- |
| HR (95% CI) | *P* | HR (95% CI) | *P* |
| Age  ≤ 60 y  > 60 y | 86 (39.1)  134 (60.9) | 1  4.31 (2.26-8.22) | <0.001 | 1  4.57 (2.25-9.28) | <0.001 |
| Sex  Female  Male | 88 (40.0)  132 (60.0) | 1  1.18 (0.74-1.90) | 0.483 | 1  1.19 (0.72-1.98) | 0.498 |
| Ann Arbor stage  I - II  III – IV | 96 (43.6)  124 (56.4) | 1  3.70 (2.09-6.57) | <0.001 | 1  3.63 (1.96-6.71) | <0.001 |
| Performance status  ECOG 0 or 1  ECOG ≥ 2 | 174 (79.1)  46 (20.9) | 1  7.79 (4.77-12.73) | <0.001 | 1  9.14 (5.36-15.57) | <0.001 |
| B symptoms  Absence  Presence | 162 (73.6)  58 (26.4) | 1  2.11 (1.20-3.94) | <0.001 | 1  2.25 (1.21-5.28) | <0.001 |
| Serum LDH ratio  Normal  Increased | 88 (40.0)  132 (60.0) | 1  2.24 (1.31-3.83) | 0.002 | 1  2.89 (1.57-5.34) | <0.001 |
| Extranodal organ involvements  0 – 1  ≥ 2 | 166 (75.5)  54 (24.5) | 1  2.48 (1.53-4.02) | <0.001 | 1  2.88 (1.73-4.79) | <0.001 |
| Bulky disease  No  Yes | 200 (90.9)  20 (9.1) | 1  1.48 (0.71-3.09) | 0.298 | 1  1.51 (0.69-3.32) | 0.308 |
| Bone marrow involvement  No  Yes | 174 (79.1)  46 (20.9) | 1  2.51 (1.53-4.12) | <0.001 | 1  2.88 (1.71-4.86) | <0.001 |
| IPI  Low or low-intermediate  High-intermediate or high | 126 (57.3)  94 (42.7) | 1  5.21 (3.07-8.85) | <0.001 | 1  6.31 (3.46-11.50) | <0.001 |
| Interim Deauville score  1 – 3  4 – 5 | 171 (77.7)  49 (22.3) | 1  3.37 (2.09-5.43) | <0.001 | 1  3.53 (2.13-5.56) | <0.001 |

Abbreviations: HR, hazard ratio; CI, confidence interval; ECOG, Eastern Cooperative Oncology Group; LDH, lactate dehydrogenase; IPI, international prognostic index.

**Table S3: Association between interim Deauville score and relapsed/refractory disease.**

|  | Interim PET-CT | | P value |
| --- | --- | --- | --- |
|  | Deauville score of 1 − 3 (N = 171) | Deauville score of 4 − 5 (N = 49) |
| No disease progression | 130 (76.0) | 20 (40.8) |  |
| Refractory disease | 15 (8.8) | 22 (44.9) | < 0.001 |
| Relapsed disease | 26 (15.2) | 7 (14.3) | 0.279 |

A refractory disease was defined as progressive disease during first-line treatment, stable disease as best response to ≥4 cycles of immunochemotherapy, or relapse ≤12 months after completion of first-line treatment. And, a relapsed disease was defined as disease progression ≥12 months following the completion of first-line R-CHOP.

**Figure S1. Risk classification according to interim Deauville score and baseline IPI scores.**


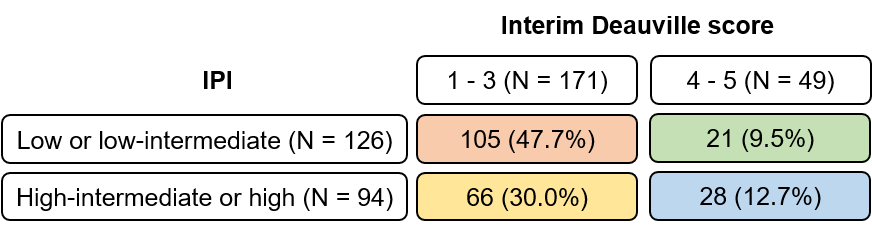


Abbreviation: IPI, international prognostic index.
